# Supplementary material for: Responses of Nutrient Resorption to Human Disturbances in Phoebe bournei Forests
Source: MDPI journal article supplement (doi:10.3390/f13060905), 2022-06-10
Supplement: s1 [file s1]

## Supplementary Material

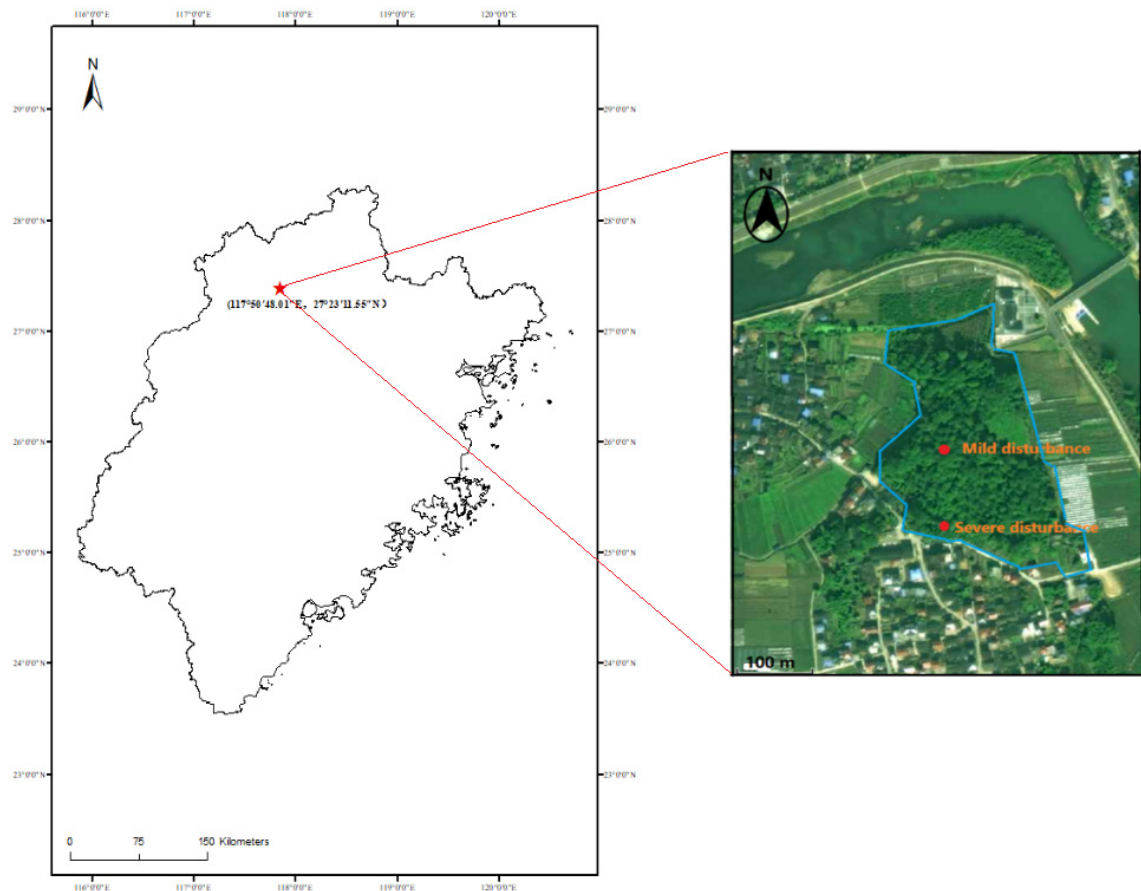

**Figure S1.** Schematic diagram of sampling sites under different disturbances in the *Phoebe bournei* forest.

**Table S1.** The basic information of species under different disturbances types of the *Phoebe bournei* forest.

| Disturbance type | Main species                                                                                                                                                                                                                                                                                                                                                                                    | Canopy density | Height (m) of tree layer | DBH (cm) of tree layer |
|------------------|-------------------------------------------------------------------------------------------------------------------------------------------------------------------------------------------------------------------------------------------------------------------------------------------------------------------------------------------------------------------------------------------------|----------------|--------------------------|------------------------|
| Mild             | <i>Phoebe bournei</i> ,<br><i>Machilus pauhoi</i> ,<br><i>Photinia serratifolia</i><br>(Chinese <i>Photinia</i> ),<br><i>Castanopsis</i><br><i>sclerophylla</i><br>( <i>Chinquapin</i> ),<br><i>Phyllostachys</i><br><i>heterocycle</i> ( <i>Moso</i><br><i>Bamboo</i> ), <i>Diplazium</i><br><i>subsINUATUM</i> , <i>Ardisia</i><br><i>japonica</i> ,<br><i>Chimonanthus</i><br><i>praecox</i> | 0.70-0.80      | $8.74 \pm 2.5$           | $12.47 \pm 0.64$       |
| Severe           | <i>Phoebe bournei</i> ,<br><i>Machilus pauhoi</i> ,                                                                                                                                                                                                                                                                                                                                             | 0.50-0.65      | $7.31 \pm 1.9$           | $11.83 \pm 0.64$       |

*Ligustrum lucidum,*  
*Camellia-Oilfera*  
*Abel, Liquidambar*  
*formosana,*  
*Osmanthus fragrans,*  
*Phyllanthus glaucus,*  
*Diplazium*  
*subsiniatum, Ardisia*  
*japonica,*  
*Chimonanthus*  
*praecox*

Note: DBH: diameter at breast height. The values of height and DBH: Mean± Standard Deviation (SD).

Table S2. Coefficient of variation of nutrient resorption efficiencies under different disturbances.

| Type               | CV (%) |       |      |
|--------------------|--------|-------|------|
|                    | NRE    | PRE   | KRE  |
| Mild disturbance   | 25.46  | 9.13  | 3.32 |
| Severe disturbance | 20.11  | 13.46 | 8.64 |

Note:NRE: nitrogen resorption efficiencies. PRE: phosphorus resorption efficiencies. KRE: potassium resorption efficiencies.
